# Supplementary material
Source: publisher site journal article supplement (https://www.spandidos-publications.com/7477/downloadSupplementary)
Supplement: Supplementary file 1 [file downloadSupplementary]

Table SI. Eczema Area and Severity Index scoring system.

| Body parts    | Proportion of area affected in individuals aged 0-7 years | Proportion of area affected in individuals >8 years of age |
|---------------|-----------------------------------------------------------|------------------------------------------------------------|
| Head and neck | x0.2                                                      | x0.1                                                       |
| Upper limbs   | x0.2                                                      | x0.2                                                       |
| Trunk         | x0.3                                                      | x0.3                                                       |
| Lower limbs   | x0.3                                                      | x0.4                                                       |

Values should be interpreted as a fraction representing the proportion of the total body area affected.

Table SII. Dermatology Life Quality Index scoring system.

| Problems over the past week                                                    | None | Slight | Serious | Very serious |
|--------------------------------------------------------------------------------|------|--------|---------|--------------|
| Do you have itchy, tingly skin?                                                |      |        |         |              |
| Do you feel sad, embarrassed or inferior because of your skin problem?         |      |        |         |              |
| Does your skin affect your ability to go shopping or do housework?             |      |        |         |              |
| Does it affect the way you dress in regard to the clothes or shoes you wear?   |      |        |         |              |
| Does the skin problem affect your social interactions, leisure and recreation? |      |        |         |              |
| Does the skin problem affect your sports and exercise?                         |      |        |         |              |
| Does the skin problem affect your work and study?                              |      |        |         |              |
| Does the skin problem affect your relationship with family and friends?        |      |        |         |              |
| Does the skin problem affect your sex life?                                    |      |        |         |              |
| How much trouble does the skin problem add to your daily routine?              |      |        |         |              |
| Total score:                                                                   |      |        |         |              |

Table SIII. Patient Oriented Eczema Measure scoring system.

| Queries about the effects of the skin issues over the past week                               | 0 days | 1-2 days | 3-4 days | 5-6 days | Every day |
|-----------------------------------------------------------------------------------------------|--------|----------|----------|----------|-----------|
| How many days did itching occur due to atopic dermatitis?                                     |        |          |          |          |           |
| How many days has sleep been affected by atopic dermatitis?                                   |        |          |          |          |           |
| How many days did atopic dermatitis cause skin bleeding?                                      |        |          |          |          |           |
| On how many days did atopic dermatitis cause oozing (clear or yellowish fluid) from the skin? |        |          |          |          |           |
| On how many days did atopic dermatitis result in cracked (dry) skin?                          |        |          |          |          |           |
| On how many days did atopic dermatitis cause the skin to flake (peel)?                        |        |          |          |          |           |
| On how many days did the skin feel dry or rough due to atopic dermatitis?                     |        |          |          |          |           |
| Total score:                                                                                  |        |          |          |          |           |

Table SIV. ADCT scoring system.

| Question                                                                                          | Frequency over the past week |          |          |          |             |
|---------------------------------------------------------------------------------------------------|------------------------------|----------|----------|----------|-------------|
|                                                                                                   | None                         | Mild     | Moderate | Severe   | Very severe |
| How would you rate the current skin condition-related symptoms (e.g., itching, dry skin or rash)? | None                         | Mild     | Moderate | Severe   | Very severe |
| On how many days have you had a series of itching episodes due to this condition?                 | None                         | 1-2 days | 3-4 days | 5-6 days | Every day   |
| How many nights have you been unable to sleep or have had trouble sleeping due to the condition?  | None                         | 1-2 days | 3-4 days | 5-6 days | Every day   |
| How much discomfort does the condition cause you?                                                 | None                         | Slight   | Moderate | Very     | Extremely   |
| How much does the condition affect your daily activities?                                         | None                         | Slight   | Moderate | Very     | Extremely   |
| How much does the condition affect your mood or emotions?                                         | None                         | Slight   | Moderate | Very     | Extremely   |
| Total score:                                                                                      |                              |          |          |          |             |

Table SV. Clinical scores of patients with atopic dermatitis treated with dupilumab.

| Score                           | Week 0            | Week 2            | Week 4            | Week 8           |
|---------------------------------|-------------------|-------------------|-------------------|------------------|
| Eczema Area and Severity Index  | 8.9 (6.2, 21.7)   | 6.9 (4.4, 12.1)   | 3.4 (2.3, 11.0)   | 1.3 (0.7, 5.8)   |
| Objective-SCORAD                | 37.0 (23.4, 48.0) | 35.3 (22.9, 36.5) | 19.3 (12.3, 32.0) | 11.2 (7.2, 24.2) |
| SCORAD                          | 46.6 (36.4, 53.5) | 36.2 (28.9, 42.0) | 23.5 (14.3, 29.5) | 21.9 (8.4, 41.8) |
| Itch Numeric Rating Scale       | 6.0 (4.5, 9.5)    | 3.0 (3.0, 6.0)    | 3.0 (2.0, 3.5)    | 2.0 (1.5, 3.5)   |
| Dermatology Life Quality Index  | 10.0 (9.0, 16)    | 6.0 (5.0, 12.0)   | 5.0 (3.0, 7.5)    | 3.0 (2.0, 7.5)   |
| Patient-oriented Eczema Measure | 14.0 (11.5, 23.5) | 10.0 (7.0, 11.5)  | 6.0 (5.0, 11.0)   | 8.0 (2.5, 11.5)  |
| Atopic Dermatitis Control Tools | 12.0 (10.5, 19.0) | 10.0 (6.5, 11.0)  | 7.0 (5.5, 9.0)    | 7.0 (3.0, 10.5)  |

SCORAD: Scoring Atopic Dermatitis index. Each index was non-normally distributed and presented as the median and interquartile range (1st quartile, 3rd quartile).

Table SVI. Levels of serum biomarkers of patients with atopic dermatitis treated with dupilumab.

| Biomarker (pg/ml)                                      | Week 0                   | Week 2                  | Week 4                  | Week 8                    |
|--------------------------------------------------------|--------------------------|-------------------------|-------------------------|---------------------------|
| Thymus and activation-regulated chemokine              |                          |                         |                         |                           |
| X ± SD                                                 | 511.91±457.52            | 251.68±298.98           | 148.35±286.50           | 148.35±286.50             |
| M (Q <sub>1</sub> , Q <sub>3</sub> )                   | 450.46 (100.13, 822.33)  | 237.69 (68.84, 519.43)  | 151.82 (42.32, 209.38)  | 151.82 (42.32, 209.38)    |
| Human β-defensin 2                                     |                          |                         |                         |                           |
| X ± SD                                                 | 1,010.06±1,093.78        | 1,044.29±1,215.23       | 450.17±739.45           | 764.25±1,391.72           |
| M (Q <sub>1</sub> , Q <sub>3</sub> )                   | 573.47 (269.98, 2712.11) | 544.16 (452.58, 996.48) | 192.55 (105.46, 655.94) | 455.84 (140.38, 1,958.41) |
| IgE against <i>Staphylococcus aureus</i> enterotoxin A |                          |                         |                         |                           |
| X ± SD                                                 | 10.57±12.63              | 9.84±11.34              | 10.18±11.85             | 10.46±11.87               |
| M (Q <sub>1</sub> , Q <sub>3</sub> )                   | 5.51 (5.22, 6.24)        | 5.62 (5.53, 6.17)       | 5.66 (5.28, 6.52)       | 6.08 (5.37, 6.72)         |

X, mean; M, median; Q<sub>1</sub>, 1st quartile; Q<sub>3</sub>, 3rd quartile.

Table SVII. Proportion of circulating Th1, Th2, Th17 and Th22 cells in patients with atopic dermatitis treated with dupilumab.

| Proportion of Th cells (%)           | Week 0             | Week 2             | Week 4             | Week 8              |
|--------------------------------------|--------------------|--------------------|--------------------|---------------------|
| Th1                                  |                    |                    |                    |                     |
| X ± SD                               | 13.38±9.11         | 10.77±6.20         | 12.31±6.80         | 10.92±7.01          |
| M (Q <sub>1</sub> , Q <sub>3</sub> ) | 11.70 (3.70, 21.0) | 9.60 (4.30, 17.60) | 7.50 (6.30, 21.10) | 10.23 (5.50, 19.00) |
| Th2                                  |                    |                    |                    |                     |
| X ± SD                               | 6.14±4.79          | 8.73±4.49          | 5.46±3.39          | 6.44±5.82           |
| M (Q <sub>1</sub> , Q <sub>3</sub> ) | 4.40 (2.50, 9.90)  | 6.50 (3.90, 13.10) | 4.50 (2.00, 12.50) | 3.20 (1.90, 11.20)  |
| Th17                                 |                    |                    |                    |                     |
| X ± SD                               | 0.36±0.34          | 0.38±0.31          | 0.38±0.23          | 0.25±0.09           |
| M (Q <sub>1</sub> , Q <sub>3</sub> ) | 0.20 (0.10, 0.60)  | 0.10 (0.10, 0.90)  | 0.30 (0.10, 0.60)  | 0.30 (0.10, 0.30)   |
| Th22                                 |                    |                    |                    |                     |
| X ± SD                               | 0.24±0.19          | 0.38±0.28          | 0.87±0.83          | 0.57±0.92           |
| M (Q <sub>1</sub> , Q <sub>3</sub> ) | 0.20 (0.10, 0.60)  | 0.20 (0.10, 0.50)  | 0.30 (0.10, 1.10)  | 0.10 (0.10, 0.20)   |
| Th2/Th1 ratio                        |                    |                    |                    |                     |
| X ± SD                               | 0.80±0.70          | 1.73±2.52          | 0.80±0.81          | 0.86±1.00           |
| M (Q <sub>1</sub> , Q <sub>3</sub> ) | 0.30 (0.19, 2.64)  | 0.66 (0.26, 1.86)  | 0.33 (0.21, 1.11)  | 0.31 (0.21, 1.42)   |

Th, T helper; X, mean; M, median; Q<sub>1</sub>, 1st quartile; Q<sub>3</sub>, 3rd quartile.
